# Supplementary material for: Common Pharmacophore of Structurally Distinct Small-Molecule Inhibitors of Intracellular Retrograde Trafficking of Ribosome Inactivating Proteins
Source: PubMed Central journal article supplement (PMC3844963; doi:10.1038/srep03397), 2013-12-02
Supplement: srep03397-s1.pdf [file srep03397-s1.pdf]

## Supplementary Information

### Common Pharmacophore of Structurally Distinct Small-Molecule Inhibitors of Intracellular Retrograde Trafficking of Ribosome Inactivating Proteins

Shichao Yu<sup>1</sup>, Jewn Giew Park<sup>1</sup>, Jennifer Nielsen Kahn<sup>2</sup>, Nilgun E. Tumer<sup>2\*</sup>, and Yuan-Ping Pang<sup>1\*</sup>

<sup>1</sup>Computer-Aided Molecular Design Laboratory, Mayo Clinic, Rochester, MN 55905, USA

<sup>2</sup>Department of Plant Biology and Pathology, School of Environmental and Biological Sciences, Rutgers University, New Brunswick, NJ 08901, USA

\*Correspondence: pang@mayo.edu (Y.-P.P. for chemistry) and [tumer@aesop.rutger.edu](mailto:tumer@aesop.rutger.edu) (N.E.T. for biology)

Page 2: Dataset S1. Cartesian coordinates of **(S)-Retro-2<sup>cycl</sup>** that is energy minimized at the HF/6-31G(d) level.

Page 6: Dataset S2. Cartesian coordinates of **(R)-Retro-2<sup>cycl</sup>** that is energy minimized at the HF/6-31G(d) level and superimposed over **(S)-Retro-2<sup>cycl</sup>**.

Page 10: Dataset S3. Cartesian coordinates of **DA2MT** that is energy minimized at the HF/6-31G(d) level and superimposed over **(S)-Retro-2<sup>cycl</sup>**.

Page 14: Dataset S4. Cartesian coordinates of **Cpd 75** that is energy minimized at the HF/6-31G(d) level and superimposed over **(S)-Retro-2<sup>cycl</sup>**.

Page 19: Dataset S5. Cartesian coordinates of **(S)-Retro-1** that is energy minimized at the HF/6-31G(d) level and superimposed over **(S)-Retro-2<sup>cycl</sup>**.

Dataset S1. Cartesian coordinates of **(S)-Retro-2<sup>cycl</sup>** that is energy minimized at the HF/6-31G(d) level.

|         |    |    |    |        |        |        |      |      |   |
|---------|----|----|----|--------|--------|--------|------|------|---|
| HETATM  | 1  | N  | 1  | -0.057 | -0.141 | 0.013  | 0.00 | 0.00 | N |
| HETATM  | 2  | N  | 1  | 2.170  | -0.936 | -0.108 | 0.00 | 0.00 | N |
| HETATM  | 3  | C  | 1  | 0.040  | 0.100  | 1.369  | 0.00 | 0.00 | C |
| HETATM  | 4  | C  | 1  | 0.835  | -1.113 | -0.631 | 0.00 | 0.00 | C |
| HETATM  | 5  | C  | 1  | -1.337 | 0.098  | -0.592 | 0.00 | 0.00 | C |
| HETATM  | 6  | C  | 1  | 1.280  | -0.377 | 2.030  | 0.00 | 0.00 | C |
| HETATM  | 7  | C  | 1  | -2.335 | -0.861 | -0.522 | 0.00 | 0.00 | C |
| HETATM  | 8  | C  | 1  | -1.576 | 1.295  | -1.242 | 0.00 | 0.00 | C |
| HETATM  | 9  | C  | 1  | 0.882  | -0.967 | -2.127 | 0.00 | 0.00 | C |
| HETATM  | 10 | C  | 1  | 1.414  | -0.268 | 3.410  | 0.00 | 0.00 | C |
| HETATM  | 11 | C  | 1  | 2.325  | -0.886 | 1.267  | 0.00 | 0.00 | C |
| HETATM  | 12 | C  | 1  | -3.563 | -0.631 | -1.118 | 0.00 | 0.00 | C |
| HETATM  | 13 | C  | 1  | -2.807 | 1.528  | -1.834 | 0.00 | 0.00 | C |
| HETATM  | 14 | C  | 1  | 0.350  | -1.801 | -3.036 | 0.00 | 0.00 | C |
| HETATM  | 15 | C  | 1  | 2.576  | -0.669 | 4.034  | 0.00 | 0.00 | C |
| HETATM  | 16 | C  | 1  | 3.505  | -1.283 | 1.893  | 0.00 | 0.00 | C |
| HETATM  | 17 | C  | 1  | -3.800 | 0.565  | -1.777 | 0.00 | 0.00 | C |
| HETATM  | 18 | C  | 1  | 1.290  | -0.243 | -4.479 | 0.00 | 0.00 | C |
| HETATM  | 19 | C  | 1  | 0.581  | -1.384 | -4.391 | 0.00 | 0.00 | C |
| HETATM  | 20 | C  | 1  | 3.619  | -1.173 | 3.263  | 0.00 | 0.00 | C |
| HETATM  | 21 | C  | 1  | 1.720  | 0.484  | -5.720 | 0.00 | 0.00 | C |
| HETATM  | 22 | O  | 1  | -0.822 | 0.672  | 1.975  | 0.00 | 0.00 | O |
| HETATM  | 23 | S  | 1  | 1.705  | 0.356  | -2.902 | 0.00 | 0.00 | S |
| HETATM  | 24 | H  | 1  | 0.465  | -2.119 | -0.423 | 0.00 | 0.00 | H |
| HETATM  | 25 | H  | 1  | 2.845  | -1.493 | -0.585 | 0.00 | 0.00 | H |
| HETATM  | 26 | H  | 1  | -2.157 | -1.780 | 0.008  | 0.00 | 0.00 | H |
| HETATM  | 27 | H  | 1  | -0.800 | 2.037  | -1.279 | 0.00 | 0.00 | H |
| HETATM  | 28 | H  | 1  | 0.593  | 0.138  | 3.968  | 0.00 | 0.00 | H |
| HETATM  | 29 | H  | 1  | -4.334 | -1.378 | -1.061 | 0.00 | 0.00 | H |
| HETATM  | 30 | H  | 1  | -2.988 | 2.461  | -2.336 | 0.00 | 0.00 | H |
| HETATM  | 31 | H  | 1  | -0.205 | -2.683 | -2.774 | 0.00 | 0.00 | H |
| HETATM  | 32 | H  | 1  | 2.679  | -0.589 | 5.101  | 0.00 | 0.00 | H |
| HETATM  | 33 | H  | 1  | 4.320  | -1.671 | 1.306  | 0.00 | 0.00 | H |
| HETATM  | 34 | H  | 1  | -4.755 | 0.746  | -2.237 | 0.00 | 0.00 | H |
| HETATM  | 35 | H  | 1  | 0.225  | -1.926 | -5.247 | 0.00 | 0.00 | H |
| HETATM  | 36 | H  | 1  | 4.532  | -1.484 | 3.739  | 0.00 | 0.00 | H |
| HETATM  | 37 | H  | 1  | 1.374  | -0.049 | -6.597 | 0.00 | 0.00 | H |
| HETATM  | 38 | H  | 1  | 2.801  | 0.565  | -5.777 | 0.00 | 0.00 | H |
| HETATM  | 39 | H  | 1  | 1.311  | 1.488  | -5.751 | 0.00 | 0.00 | H |
| CONNECT | 1  | 3  | 4  | 5      |        |        |      |      |   |
| CONNECT | 2  | 4  | 11 | 25     |        |        |      |      |   |
| CONNECT | 3  | 1  | 6  |        |        |        |      |      |   |
| CONNECT | 3  | 22 |    |        |        |        |      |      |   |
| CONNECT | 3  | 22 |    |        |        |        |      |      |   |
| CONNECT | 4  | 1  | 2  | 9      | 24     |        |      |      |   |
| CONNECT | 5  | 1  |    |        |        |        |      |      |   |
| CONNECT | 5  | 7  |    |        |        |        |      |      |   |
| CONNECT | 5  | 7  |    |        |        |        |      |      |   |
| CONNECT | 5  | 7  |    |        |        |        |      |      |   |
| CONNECT | 5  | 7  |    |        |        |        |      |      |   |
| CONNECT | 5  | 8  |    |        |        |        |      |      |   |
| CONNECT | 5  | 8  |    |        |        |        |      |      |   |

|        |    |    |
|--------|----|----|
| CONECT | 5  | 8  |
| CONECT | 5  | 8  |
| CONECT | 6  | 3  |
| CONECT | 6  | 10 |
| CONECT | 6  | 10 |
| CONECT | 6  | 10 |
| CONECT | 6  | 10 |
| CONECT | 6  | 11 |
| CONECT | 6  | 11 |
| CONECT | 6  | 11 |
| CONECT | 6  | 11 |
| CONECT | 7  | 5  |
| CONECT | 7  | 5  |
| CONECT | 7  | 5  |
| CONECT | 7  | 5  |
| CONECT | 7  | 12 |
| CONECT | 7  | 12 |
| CONECT | 7  | 12 |
| CONECT | 7  | 12 |
| CONECT | 7  | 26 |
| CONECT | 8  | 5  |
| CONECT | 8  | 5  |
| CONECT | 8  | 5  |
| CONECT | 8  | 5  |
| CONECT | 8  | 13 |
| CONECT | 8  | 13 |
| CONECT | 8  | 13 |
| CONECT | 8  | 13 |
| CONECT | 8  | 27 |
| CONECT | 9  | 4  |
| CONECT | 9  | 14 |
| CONECT | 9  | 14 |
| CONECT | 9  | 14 |
| CONECT | 9  | 14 |
| CONECT | 9  | 23 |
| CONECT | 9  | 23 |
| CONECT | 9  | 23 |
| CONECT | 9  | 23 |
| CONECT | 10 | 6  |
| CONECT | 10 | 6  |
| CONECT | 10 | 6  |
| CONECT | 10 | 6  |
| CONECT | 10 | 15 |
| CONECT | 10 | 15 |
| CONECT | 10 | 15 |
| CONECT | 10 | 15 |
| CONECT | 10 | 28 |
| CONECT | 11 | 2  |
| CONECT | 11 | 6  |
| CONECT | 11 | 6  |
| CONECT | 11 | 6  |
| CONECT | 11 | 6  |
| CONECT | 11 | 16 |
| CONECT | 11 | 16 |
| CONECT | 11 | 16 |

|         |    |    |
|---------|----|----|
| CONNECT | 11 | 16 |
| CONNECT | 12 | 7  |
| CONNECT | 12 | 7  |
| CONNECT | 12 | 7  |
| CONNECT | 12 | 7  |
| CONNECT | 12 | 17 |
| CONNECT | 12 | 17 |
| CONNECT | 12 | 17 |
| CONNECT | 12 | 17 |
| CONNECT | 12 | 29 |
| CONNECT | 13 | 8  |
| CONNECT | 13 | 8  |
| CONNECT | 13 | 8  |
| CONNECT | 13 | 8  |
| CONNECT | 13 | 17 |
| CONNECT | 13 | 17 |
| CONNECT | 13 | 17 |
| CONNECT | 13 | 17 |
| CONNECT | 13 | 30 |
| CONNECT | 14 | 9  |
| CONNECT | 14 | 9  |
| CONNECT | 14 | 9  |
| CONNECT | 14 | 9  |
| CONNECT | 14 | 19 |
| CONNECT | 14 | 19 |
| CONNECT | 14 | 19 |
| CONNECT | 14 | 19 |
| CONNECT | 14 | 31 |
| CONNECT | 15 | 10 |
| CONNECT | 15 | 10 |
| CONNECT | 15 | 10 |
| CONNECT | 15 | 10 |
| CONNECT | 15 | 20 |
| CONNECT | 15 | 20 |
| CONNECT | 15 | 20 |
| CONNECT | 15 | 20 |
| CONNECT | 15 | 32 |
| CONNECT | 16 | 11 |
| CONNECT | 16 | 11 |
| CONNECT | 16 | 11 |
| CONNECT | 16 | 11 |
| CONNECT | 16 | 20 |
| CONNECT | 16 | 20 |
| CONNECT | 16 | 20 |
| CONNECT | 16 | 20 |
| CONNECT | 16 | 33 |
| CONNECT | 17 | 12 |
| CONNECT | 17 | 12 |
| CONNECT | 17 | 12 |
| CONNECT | 17 | 12 |
| CONNECT | 17 | 13 |
| CONNECT | 17 | 13 |
| CONNECT | 17 | 13 |
| CONNECT | 17 | 13 |
| CONNECT | 17 | 34 |

|        |    |    |    |    |    |
|--------|----|----|----|----|----|
| CONECT | 18 | 19 |    |    |    |
| CONECT | 18 | 19 |    |    |    |
| CONECT | 18 | 19 |    |    |    |
| CONECT | 18 | 19 |    |    |    |
| CONECT | 18 | 21 |    |    |    |
| CONECT | 18 | 23 |    |    |    |
| CONECT | 18 | 23 |    |    |    |
| CONECT | 18 | 23 |    |    |    |
| CONECT | 18 | 23 |    |    |    |
| CONECT | 19 | 14 |    |    |    |
| CONECT | 19 | 14 |    |    |    |
| CONECT | 19 | 14 |    |    |    |
| CONECT | 19 | 14 |    |    |    |
| CONECT | 19 | 18 |    |    |    |
| CONECT | 19 | 18 |    |    |    |
| CONECT | 19 | 18 |    |    |    |
| CONECT | 19 | 18 |    |    |    |
| CONECT | 19 | 35 |    |    |    |
| CONECT | 20 | 15 |    |    |    |
| CONECT | 20 | 15 |    |    |    |
| CONECT | 20 | 15 |    |    |    |
| CONECT | 20 | 15 |    |    |    |
| CONECT | 20 | 16 |    |    |    |
| CONECT | 20 | 16 |    |    |    |
| CONECT | 20 | 16 |    |    |    |
| CONECT | 20 | 16 |    |    |    |
| CONECT | 20 | 36 |    |    |    |
| CONECT | 21 | 18 | 37 | 38 | 39 |
| CONECT | 22 | 3  |    |    |    |
| CONECT | 22 | 3  |    |    |    |
| CONECT | 23 | 9  |    |    |    |
| CONECT | 23 | 9  |    |    |    |
| CONECT | 23 | 9  |    |    |    |
| CONECT | 23 | 9  |    |    |    |
| CONECT | 23 | 18 |    |    |    |
| CONECT | 23 | 18 |    |    |    |
| CONECT | 23 | 18 |    |    |    |
| CONECT | 23 | 18 |    |    |    |
| CONECT | 24 | 4  |    |    |    |
| CONECT | 25 | 2  |    |    |    |
| CONECT | 26 | 7  |    |    |    |
| CONECT | 27 | 8  |    |    |    |
| CONECT | 28 | 10 |    |    |    |
| CONECT | 29 | 12 |    |    |    |
| CONECT | 30 | 13 |    |    |    |
| CONECT | 31 | 14 |    |    |    |
| CONECT | 32 | 15 |    |    |    |
| CONECT | 33 | 16 |    |    |    |
| CONECT | 34 | 17 |    |    |    |
| CONECT | 35 | 19 |    |    |    |
| CONECT | 36 | 20 |    |    |    |
| CONECT | 37 | 21 |    |    |    |
| CONECT | 38 | 21 |    |    |    |
| CONECT | 39 | 21 |    |    |    |
| END    |    |    |    |    |    |

Dataset S2. Cartesian coordinates of **(R)-Retro-2<sup>cycl</sup>** that is energy minimized at the HF/6-31G(d) level and superimposed over **(S)-Retro-2<sup>cycl</sup>**.

|         |    |    |    |        |        |        |      |      |   |
|---------|----|----|----|--------|--------|--------|------|------|---|
| HETATM  | 1  | N  | 1  | 0.000  | 0.000  | 0.000  | 0.00 | 0.00 | N |
| HETATM  | 2  | N  | 1  | 2.160  | -0.959 | -0.106 | 0.00 | 0.00 | N |
| HETATM  | 3  | C  | 1  | 0.000  | 0.000  | 1.379  | 0.00 | 0.00 | C |
| HETATM  | 4  | C  | 1  | 1.275  | 0.000  | -0.729 | 0.00 | 0.00 | C |
| HETATM  | 5  | C  | 1  | -1.157 | 0.547  | -0.648 | 0.00 | 0.00 | C |
| HETATM  | 6  | C  | 1  | 1.282  | -0.373 | 2.029  | 0.00 | 0.00 | C |
| HETATM  | 7  | C  | 1  | -2.107 | -0.302 | -1.189 | 0.00 | 0.00 | C |
| HETATM  | 8  | C  | 1  | -1.330 | 1.920  | -0.733 | 0.00 | 0.00 | C |
| HETATM  | 9  | C  | 1  | 1.126  | -0.378 | -2.183 | 0.00 | 0.00 | C |
| HETATM  | 10 | C  | 1  | 1.404  | -0.294 | 3.413  | 0.00 | 0.00 | C |
| HETATM  | 11 | C  | 1  | 2.338  | -0.855 | 1.264  | 0.00 | 0.00 | C |
| HETATM  | 12 | C  | 1  | -3.222 | 0.220  | -1.824 | 0.00 | 0.00 | C |
| HETATM  | 13 | C  | 1  | -2.444 | 2.441  | -1.370 | 0.00 | 0.00 | C |
| HETATM  | 14 | C  | 1  | 0.953  | -1.609 | -2.696 | 0.00 | 0.00 | C |
| HETATM  | 15 | C  | 1  | 2.570  | -0.684 | 4.036  | 0.00 | 0.00 | C |
| HETATM  | 16 | C  | 1  | 3.515  | -1.260 | 1.891  | 0.00 | 0.00 | C |
| HETATM  | 17 | C  | 1  | -3.390 | 1.592  | -1.918 | 0.00 | 0.00 | C |
| HETATM  | 18 | C  | 1  | 1.022  | -0.393 | -4.678 | 0.00 | 0.00 | C |
| HETATM  | 19 | C  | 1  | 0.888  | -1.616 | -4.130 | 0.00 | 0.00 | C |
| HETATM  | 20 | C  | 1  | 3.621  | -1.170 | 3.264  | 0.00 | 0.00 | C |
| HETATM  | 21 | C  | 1  | 1.003  | -0.021 | -6.132 | 0.00 | 0.00 | C |
| HETATM  | 22 | O  | 1  | -0.980 | 0.266  | 2.016  | 0.00 | 0.00 | O |
| HETATM  | 23 | S  | 1  | 1.229  | 0.810  | -3.445 | 0.00 | 0.00 | S |
| HETATM  | 24 | H  | 1  | 1.701  | 1.004  | -0.676 | 0.00 | 0.00 | H |
| HETATM  | 25 | H  | 1  | 2.999  | -1.094 | -0.627 | 0.00 | 0.00 | H |
| HETATM  | 26 | H  | 1  | -1.968 | -1.363 | -1.107 | 0.00 | 0.00 | H |
| HETATM  | 27 | H  | 1  | -0.603 | 2.577  | -0.291 | 0.00 | 0.00 | H |
| HETATM  | 28 | H  | 1  | 0.567  | 0.071  | 3.976  | 0.00 | 0.00 | H |
| HETATM  | 29 | H  | 1  | -3.957 | -0.444 | -2.241 | 0.00 | 0.00 | H |
| HETATM  | 30 | H  | 1  | -2.573 | 3.507  | -1.431 | 0.00 | 0.00 | H |
| HETATM  | 31 | H  | 1  | 0.875  | -2.490 | -2.089 | 0.00 | 0.00 | H |
| HETATM  | 32 | H  | 1  | 2.666  | -0.619 | 5.104  | 0.00 | 0.00 | H |
| HETATM  | 33 | H  | 1  | 4.332  | -1.640 | 1.304  | 0.00 | 0.00 | H |
| HETATM  | 34 | H  | 1  | -4.257 | 1.996  | -2.411 | 0.00 | 0.00 | H |
| HETATM  | 35 | H  | 1  | 0.748  | -2.508 | -4.712 | 0.00 | 0.00 | H |
| HETATM  | 36 | H  | 1  | 4.534  | -1.481 | 3.740  | 0.00 | 0.00 | H |
| HETATM  | 37 | H  | 1  | 0.872  | -0.911 | -6.737 | 0.00 | 0.00 | H |
| HETATM  | 38 | H  | 1  | 1.930  | 0.457  | -6.433 | 0.00 | 0.00 | H |
| HETATM  | 39 | H  | 1  | 0.190  | 0.662  | -6.356 | 0.00 | 0.00 | H |
| CONNECT | 1  | 3  | 4  | 5      |        |        |      |      |   |
| CONNECT | 2  | 4  | 11 | 25     |        |        |      |      |   |
| CONNECT | 3  | 1  | 6  |        |        |        |      |      |   |
| CONNECT | 3  | 22 |    |        |        |        |      |      |   |
| CONNECT | 3  | 22 |    |        |        |        |      |      |   |
| CONNECT | 4  | 1  | 2  | 9      | 24     |        |      |      |   |
| CONNECT | 5  | 1  |    |        |        |        |      |      |   |
| CONNECT | 5  | 7  |    |        |        |        |      |      |   |
| CONNECT | 5  | 7  |    |        |        |        |      |      |   |
| CONNECT | 5  | 7  |    |        |        |        |      |      |   |
| CONNECT | 5  | 7  |    |        |        |        |      |      |   |

|         |    |    |
|---------|----|----|
| CONNECT | 5  | 8  |
| CONNECT | 5  | 8  |
| CONNECT | 5  | 8  |
| CONNECT | 5  | 8  |
| CONNECT | 6  | 3  |
| CONNECT | 6  | 10 |
| CONNECT | 6  | 10 |
| CONNECT | 6  | 10 |
| CONNECT | 6  | 10 |
| CONNECT | 6  | 11 |
| CONNECT | 6  | 11 |
| CONNECT | 6  | 11 |
| CONNECT | 6  | 11 |
| CONNECT | 7  | 5  |
| CONNECT | 7  | 5  |
| CONNECT | 7  | 5  |
| CONNECT | 7  | 5  |
| CONNECT | 7  | 12 |
| CONNECT | 7  | 12 |
| CONNECT | 7  | 12 |
| CONNECT | 7  | 12 |
| CONNECT | 7  | 26 |
| CONNECT | 8  | 5  |
| CONNECT | 8  | 5  |
| CONNECT | 8  | 5  |
| CONNECT | 8  | 5  |
| CONNECT | 8  | 13 |
| CONNECT | 8  | 13 |
| CONNECT | 8  | 13 |
| CONNECT | 8  | 13 |
| CONNECT | 8  | 27 |
| CONNECT | 9  | 4  |
| CONNECT | 9  | 14 |
| CONNECT | 9  | 14 |
| CONNECT | 9  | 14 |
| CONNECT | 9  | 14 |
| CONNECT | 9  | 23 |
| CONNECT | 9  | 23 |
| CONNECT | 9  | 23 |
| CONNECT | 9  | 23 |
| CONNECT | 10 | 6  |
| CONNECT | 10 | 6  |
| CONNECT | 10 | 6  |
| CONNECT | 10 | 6  |
| CONNECT | 10 | 15 |
| CONNECT | 10 | 15 |
| CONNECT | 10 | 15 |
| CONNECT | 10 | 15 |
| CONNECT | 10 | 28 |
| CONNECT | 11 | 2  |
| CONNECT | 11 | 6  |
| CONNECT | 11 | 6  |
| CONNECT | 11 | 6  |
| CONNECT | 11 | 6  |
| CONNECT | 11 | 16 |

|         |    |    |
|---------|----|----|
| CONNECT | 11 | 16 |
| CONNECT | 11 | 16 |
| CONNECT | 11 | 16 |
| CONNECT | 12 | 7  |
| CONNECT | 12 | 7  |
| CONNECT | 12 | 7  |
| CONNECT | 12 | 7  |
| CONNECT | 12 | 17 |
| CONNECT | 12 | 17 |
| CONNECT | 12 | 17 |
| CONNECT | 12 | 17 |
| CONNECT | 12 | 29 |
| CONNECT | 13 | 8  |
| CONNECT | 13 | 8  |
| CONNECT | 13 | 8  |
| CONNECT | 13 | 8  |
| CONNECT | 13 | 17 |
| CONNECT | 13 | 17 |
| CONNECT | 13 | 17 |
| CONNECT | 13 | 17 |
| CONNECT | 13 | 30 |
| CONNECT | 14 | 9  |
| CONNECT | 14 | 9  |
| CONNECT | 14 | 9  |
| CONNECT | 14 | 9  |
| CONNECT | 14 | 19 |
| CONNECT | 14 | 19 |
| CONNECT | 14 | 19 |
| CONNECT | 14 | 19 |
| CONNECT | 14 | 31 |
| CONNECT | 15 | 10 |
| CONNECT | 15 | 10 |
| CONNECT | 15 | 10 |
| CONNECT | 15 | 10 |
| CONNECT | 15 | 20 |
| CONNECT | 15 | 20 |
| CONNECT | 15 | 20 |
| CONNECT | 15 | 20 |
| CONNECT | 15 | 32 |
| CONNECT | 16 | 11 |
| CONNECT | 16 | 11 |
| CONNECT | 16 | 11 |
| CONNECT | 16 | 11 |
| CONNECT | 16 | 20 |
| CONNECT | 16 | 20 |
| CONNECT | 16 | 20 |
| CONNECT | 16 | 20 |
| CONNECT | 16 | 33 |
| CONNECT | 17 | 12 |
| CONNECT | 17 | 12 |
| CONNECT | 17 | 12 |
| CONNECT | 17 | 12 |
| CONNECT | 17 | 13 |
| CONNECT | 17 | 13 |
| CONNECT | 17 | 13 |



|        |    |    |    |    |    |
|--------|----|----|----|----|----|
| CONECT | 17 | 13 |    |    |    |
| CONECT | 17 | 34 |    |    |    |
| CONECT | 18 | 19 |    |    |    |
| CONECT | 18 | 19 |    |    |    |
| CONECT | 18 | 19 |    |    |    |
| CONECT | 18 | 19 |    |    |    |
| CONECT | 18 | 21 |    |    |    |
| CONECT | 18 | 23 |    |    |    |
| CONECT | 18 | 23 |    |    |    |
| CONECT | 18 | 23 |    |    |    |
| CONECT | 18 | 23 |    |    |    |
| CONECT | 19 | 14 |    |    |    |
| CONECT | 19 | 14 |    |    |    |
| CONECT | 19 | 14 |    |    |    |
| CONECT | 19 | 14 |    |    |    |
| CONECT | 19 | 18 |    |    |    |
| CONECT | 19 | 18 |    |    |    |
| CONECT | 19 | 18 |    |    |    |
| CONECT | 19 | 18 |    |    |    |
| CONECT | 19 | 35 |    |    |    |
| CONECT | 20 | 15 |    |    |    |
| CONECT | 20 | 15 |    |    |    |
| CONECT | 20 | 15 |    |    |    |
| CONECT | 20 | 15 |    |    |    |
| CONECT | 20 | 16 |    |    |    |
| CONECT | 20 | 16 |    |    |    |
| CONECT | 20 | 16 |    |    |    |
| CONECT | 20 | 16 |    |    |    |
| CONECT | 20 | 16 |    |    |    |
| CONECT | 20 | 36 |    |    |    |
| CONECT | 21 | 18 | 37 | 38 | 39 |
| CONECT | 22 | 3  |    |    |    |
| CONECT | 22 | 3  |    |    |    |
| CONECT | 23 | 9  |    |    |    |
| CONECT | 23 | 9  |    |    |    |
| CONECT | 23 | 9  |    |    |    |
| CONECT | 23 | 9  |    |    |    |
| CONECT | 23 | 18 |    |    |    |
| CONECT | 23 | 18 |    |    |    |
| CONECT | 23 | 18 |    |    |    |
| CONECT | 23 | 18 |    |    |    |
| CONECT | 24 | 4  |    |    |    |
| CONECT | 25 | 2  |    |    |    |
| CONECT | 26 | 7  |    |    |    |
| CONECT | 27 | 8  |    |    |    |
| CONECT | 28 | 10 |    |    |    |
| CONECT | 29 | 12 |    |    |    |
| CONECT | 30 | 13 |    |    |    |
| CONECT | 31 | 14 |    |    |    |
| CONECT | 32 | 15 |    |    |    |
| CONECT | 33 | 16 |    |    |    |
| CONECT | 34 | 17 |    |    |    |
| CONECT | 35 | 19 |    |    |    |
| CONECT | 36 | 20 |    |    |    |
| CONECT | 37 | 21 |    |    |    |
| CONECT | 38 | 21 |    |    |    |

CONNECT 39 21  
END

Dataset S3. Cartesian coordinates of **DA2MT** that is energy minimized at the HF/6-31G(d) level and superimposed over **(S)-Retro-2<sup>cycl</sup>**.

|         |    |   |   |        |        |        |      |      |   |
|---------|----|---|---|--------|--------|--------|------|------|---|
| HETATM  | 1  | N | 1 | 0.045  | -0.032 | 0.015  | 0.00 | 0.00 | N |
| HETATM  | 2  | N | 1 | 2.198  | -0.957 | -0.099 | 0.00 | 0.00 | N |
| HETATM  | 3  | C | 1 | 0.088  | 0.179  | 1.400  | 0.00 | 0.00 | C |
| HETATM  | 4  | C | 1 | 1.128  | -0.571 | -0.668 | 0.00 | 0.00 | C |
| HETATM  | 5  | C | 1 | -1.223 | 0.215  | -0.620 | 0.00 | 0.00 | C |
| HETATM  | 6  | C | 1 | 1.320  | -0.270 | 2.049  | 0.00 | 0.00 | C |
| HETATM  | 7  | C | 1 | -2.017 | -0.852 | -0.998 | 0.00 | 0.00 | C |
| HETATM  | 8  | C | 1 | -1.653 | 1.516  | -0.818 | 0.00 | 0.00 | C |
| HETATM  | 9  | C | 1 | 1.083  | -0.740 | -2.142 | 0.00 | 0.00 | C |
| HETATM  | 10 | C | 1 | 1.475  | -0.147 | 3.433  | 0.00 | 0.00 | C |
| HETATM  | 11 | C | 1 | 2.316  | -0.843 | 1.272  | 0.00 | 0.00 | C |
| HETATM  | 12 | C | 1 | -3.238 | -0.617 | -1.609 | 0.00 | 0.00 | C |
| HETATM  | 13 | C | 1 | -2.877 | 1.747  | -1.420 | 0.00 | 0.00 | C |
| HETATM  | 14 | C | 1 | 1.658  | -1.783 | -2.774 | 0.00 | 0.00 | C |
| HETATM  | 15 | C | 1 | 2.624  | -0.598 | 4.032  | 0.00 | 0.00 | C |
| HETATM  | 16 | C | 1 | 3.487  | -1.300 | 1.890  | 0.00 | 0.00 | C |
| HETATM  | 17 | C | 1 | -3.668 | 0.681  | -1.822 | 0.00 | 0.00 | C |
| HETATM  | 18 | C | 1 | 1.038  | -0.539 | -4.629 | 0.00 | 0.00 | C |
| HETATM  | 19 | C | 1 | 1.619  | -1.677 | -4.199 | 0.00 | 0.00 | C |
| HETATM  | 20 | C | 1 | 3.632  | -1.177 | 3.249  | 0.00 | 0.00 | C |
| HETATM  | 21 | C | 1 | 0.827  | -0.084 | -6.045 | 0.00 | 0.00 | C |
| HETATM  | 22 | O | 1 | -0.836 | 0.671  | 1.978  | 0.00 | 0.00 | O |
| HETATM  | 23 | S | 1 | 0.491  | 0.422  | -3.297 | 0.00 | 0.00 | S |
| HETATM  | 24 | H | 1 | -1.678 | -1.857 | -0.822 | 0.00 | 0.00 | H |
| HETATM  | 25 | H | 1 | -1.038 | 2.334  | -0.496 | 0.00 | 0.00 | H |
| HETATM  | 26 | H | 1 | 0.682  | 0.299  | 4.003  | 0.00 | 0.00 | H |
| HETATM  | 27 | H | 1 | -3.851 | -1.447 | -1.910 | 0.00 | 0.00 | H |
| HETATM  | 28 | H | 1 | -3.212 | 2.756  | -1.575 | 0.00 | 0.00 | H |
| HETATM  | 29 | H | 1 | 2.114  | -2.597 | -2.245 | 0.00 | 0.00 | H |
| HETATM  | 30 | H | 1 | 2.755  | -0.508 | 5.095  | 0.00 | 0.00 | H |
| HETATM  | 31 | H | 1 | 4.255  | -1.736 | 1.279  | 0.00 | 0.00 | H |
| HETATM  | 32 | H | 1 | -4.617 | 0.864  | -2.292 | 0.00 | 0.00 | H |
| HETATM  | 33 | H | 1 | 2.017  | -2.424 | -4.861 | 0.00 | 0.00 | H |
| HETATM  | 34 | H | 1 | 4.533  | -1.528 | 3.721  | 0.00 | 0.00 | H |
| HETATM  | 35 | H | 1 | 1.232  | -0.820 | -6.730 | 0.00 | 0.00 | H |
| HETATM  | 36 | H | 1 | 1.323  | 0.861  | -6.234 | 0.00 | 0.00 | H |
| HETATM  | 37 | H | 1 | -0.227 | 0.041  | -6.267 | 0.00 | 0.00 | H |
| CONNECT | 1  |   | 3 |        |        |        |      |      |   |
| CONNECT | 1  |   | 3 |        |        |        |      |      |   |
| CONNECT | 1  |   | 3 |        |        |        |      |      |   |
| CONNECT | 1  |   | 3 |        |        |        |      |      |   |
| CONNECT | 1  |   | 4 |        |        |        |      |      |   |
| CONNECT | 1  |   | 4 |        |        |        |      |      |   |
| CONNECT | 1  |   | 4 |        |        |        |      |      |   |
| CONNECT | 1  |   | 4 |        |        |        |      |      |   |
| CONNECT | 1  |   | 5 |        |        |        |      |      |   |
| CONNECT | 2  |   | 4 |        |        |        |      |      |   |
| CONNECT | 2  |   | 4 |        |        |        |      |      |   |
| CONNECT | 2  |   | 4 |        |        |        |      |      |   |

|        |   |    |
|--------|---|----|
| CONECT | 2 | 4  |
| CONECT | 2 | 11 |
| CONECT | 2 | 11 |
| CONECT | 2 | 11 |
| CONECT | 2 | 11 |
| CONECT | 3 | 1  |
| CONECT | 3 | 1  |
| CONECT | 3 | 1  |
| CONECT | 3 | 1  |
| CONECT | 3 | 6  |
| CONECT | 3 | 6  |
| CONECT | 3 | 6  |
| CONECT | 3 | 6  |
| CONECT | 3 | 22 |
| CONECT | 3 | 22 |
| CONECT | 4 | 1  |
| CONECT | 4 | 1  |
| CONECT | 4 | 1  |
| CONECT | 4 | 1  |
| CONECT | 4 | 2  |
| CONECT | 4 | 2  |
| CONECT | 4 | 2  |
| CONECT | 4 | 2  |
| CONECT | 4 | 9  |
| CONECT | 5 | 1  |
| CONECT | 5 | 7  |
| CONECT | 5 | 7  |
| CONECT | 5 | 7  |
| CONECT | 5 | 7  |
| CONECT | 5 | 8  |
| CONECT | 5 | 8  |
| CONECT | 5 | 8  |
| CONECT | 5 | 8  |
| CONECT | 6 | 3  |
| CONECT | 6 | 3  |
| CONECT | 6 | 3  |
| CONECT | 6 | 3  |
| CONECT | 6 | 10 |
| CONECT | 6 | 10 |
| CONECT | 6 | 10 |
| CONECT | 6 | 10 |
| CONECT | 6 | 11 |
| CONECT | 6 | 11 |
| CONECT | 6 | 11 |
| CONECT | 6 | 11 |
| CONECT | 7 | 5  |
| CONECT | 7 | 5  |
| CONECT | 7 | 5  |
| CONECT | 7 | 5  |
| CONECT | 7 | 12 |
| CONECT | 7 | 12 |
| CONECT | 7 | 12 |
| CONECT | 7 | 12 |
| CONECT | 7 | 24 |
| CONECT | 8 | 5  |

|         |    |    |
|---------|----|----|
| CONNECT | 8  | 5  |
| CONNECT | 8  | 5  |
| CONNECT | 8  | 5  |
| CONNECT | 8  | 13 |
| CONNECT | 8  | 13 |
| CONNECT | 8  | 13 |
| CONNECT | 8  | 13 |
| CONNECT | 8  | 25 |
| CONNECT | 9  | 4  |
| CONNECT | 9  | 14 |
| CONNECT | 9  | 14 |
| CONNECT | 9  | 14 |
| CONNECT | 9  | 14 |
| CONNECT | 9  | 23 |
| CONNECT | 9  | 23 |
| CONNECT | 9  | 23 |
| CONNECT | 9  | 23 |
| CONNECT | 10 | 6  |
| CONNECT | 10 | 6  |
| CONNECT | 10 | 6  |
| CONNECT | 10 | 6  |
| CONNECT | 10 | 15 |
| CONNECT | 10 | 15 |
| CONNECT | 10 | 15 |
| CONNECT | 10 | 15 |
| CONNECT | 10 | 26 |
| CONNECT | 11 | 2  |
| CONNECT | 11 | 2  |
| CONNECT | 11 | 2  |
| CONNECT | 11 | 2  |
| CONNECT | 11 | 6  |
| CONNECT | 11 | 6  |
| CONNECT | 11 | 6  |
| CONNECT | 11 | 6  |
| CONNECT | 11 | 16 |
| CONNECT | 11 | 16 |
| CONNECT | 11 | 16 |
| CONNECT | 11 | 16 |
| CONNECT | 12 | 7  |
| CONNECT | 12 | 7  |
| CONNECT | 12 | 7  |
| CONNECT | 12 | 7  |
| CONNECT | 12 | 17 |
| CONNECT | 12 | 17 |
| CONNECT | 12 | 17 |
| CONNECT | 12 | 17 |
| CONNECT | 12 | 27 |
| CONNECT | 13 | 8  |
| CONNECT | 13 | 8  |
| CONNECT | 13 | 8  |
| CONNECT | 13 | 8  |
| CONNECT | 13 | 17 |
| CONNECT | 13 | 17 |
| CONNECT | 13 | 17 |
| CONNECT | 13 | 17 |

|        |    |    |
|--------|----|----|
| CONECT | 13 | 28 |
| CONECT | 14 | 9  |
| CONECT | 14 | 9  |
| CONECT | 14 | 9  |
| CONECT | 14 | 9  |
| CONECT | 14 | 19 |
| CONECT | 14 | 19 |
| CONECT | 14 | 19 |
| CONECT | 14 | 19 |
| CONECT | 14 | 29 |
| CONECT | 15 | 10 |
| CONECT | 15 | 10 |
| CONECT | 15 | 10 |
| CONECT | 15 | 10 |
| CONECT | 15 | 20 |
| CONECT | 15 | 20 |
| CONECT | 15 | 20 |
| CONECT | 15 | 20 |
| CONECT | 15 | 30 |
| CONECT | 16 | 11 |
| CONECT | 16 | 11 |
| CONECT | 16 | 11 |
| CONECT | 16 | 11 |
| CONECT | 16 | 20 |
| CONECT | 16 | 20 |
| CONECT | 16 | 20 |
| CONECT | 16 | 20 |
| CONECT | 16 | 31 |
| CONECT | 17 | 12 |
| CONECT | 17 | 12 |
| CONECT | 17 | 12 |
| CONECT | 17 | 12 |
| CONECT | 17 | 13 |
| CONECT | 17 | 13 |
| CONECT | 17 | 13 |
| CONECT | 17 | 13 |
| CONECT | 17 | 32 |
| CONECT | 18 | 19 |
| CONECT | 18 | 19 |
| CONECT | 18 | 19 |
| CONECT | 18 | 19 |
| CONECT | 18 | 21 |
| CONECT | 18 | 23 |
| CONECT | 18 | 23 |
| CONECT | 18 | 23 |
| CONECT | 18 | 23 |
| CONECT | 19 | 14 |
| CONECT | 19 | 14 |
| CONECT | 19 | 14 |
| CONECT | 19 | 14 |
| CONECT | 19 | 18 |
| CONECT | 19 | 18 |
| CONECT | 19 | 18 |
| CONECT | 19 | 18 |
| CONECT | 19 | 33 |

```

CONNECT 20 15
CONNECT 20 15
CONNECT 20 15
CONNECT 20 15
CONNECT 20 16
CONNECT 20 16
CONNECT 20 16
CONNECT 20 16
CONNECT 20 34
CONNECT 21 18 35 36 37
CONNECT 22 3
CONNECT 22 3
CONNECT 23 9
CONNECT 23 9
CONNECT 23 9
CONNECT 23 9
CONNECT 23 18
CONNECT 23 18
CONNECT 23 18
CONNECT 23 18
CONNECT 24 7
CONNECT 25 8
CONNECT 26 10
CONNECT 27 12
CONNECT 28 13
CONNECT 29 14
CONNECT 30 15
CONNECT 31 16
CONNECT 32 17
CONNECT 33 19
CONNECT 34 20
CONNECT 35 21
CONNECT 36 21
CONNECT 37 21
END

```

Dataset S4. Cartesian coordinates of **Cpd 75** that is energy minimized at the HF/6-31G(d) level and superimposed over **(S)-Retro-2<sup>cycl</sup>**.

```

HETATM 1 N 1 1.023 0.203 2.745 0.00 0.00 N
HETATM 2 N 1 1.090 -0.276 1.471 0.00 0.00 N
HETATM 3 N 1 2.945 -0.835 2.375 0.00 0.00 N
HETATM 4 N 1 2.325 -1.387 0.015 0.00 0.00 N
HETATM 5 N 1 -0.968 0.202 0.271 0.00 0.00 N
HETATM 6 C 1 2.145 -0.149 3.247 0.00 0.00 C
HETATM 7 C 1 2.231 -0.911 1.209 0.00 0.00 C
HETATM 8 C 1 0.319 -0.334 0.318 0.00 0.00 C
HETATM 9 C 1 1.113 -1.025 -0.550 0.00 0.00 C
HETATM 10 C 1 0.790 -1.426 -1.942 0.00 0.00 C
HETATM 11 C 1 -1.375 1.147 -0.705 0.00 0.00 C
HETATM 12 C 1 0.425 -2.738 -2.209 0.00 0.00 C
HETATM 13 C 1 0.859 -0.524 -3.003 0.00 0.00 C
HETATM 14 C 1 -0.754 2.399 -0.768 0.00 0.00 C
HETATM 15 C 1 -2.441 0.838 -1.557 0.00 0.00 C

```

|         |    |    |   |        |        |        |      |      |    |
|---------|----|----|---|--------|--------|--------|------|------|----|
| HETATM  | 16 | C  | 1 | 0.104  | -3.136 | -3.493 | 0.00 | 0.00 | C  |
| HETATM  | 17 | C  | 1 | 0.534  | -0.930 | -4.289 | 0.00 | 0.00 | C  |
| HETATM  | 18 | C  | 1 | -1.188 | 3.309  | -1.721 | 0.00 | 0.00 | C  |
| HETATM  | 19 | C  | 1 | -2.858 | 1.785  | -2.484 | 0.00 | 0.00 | C  |
| HETATM  | 20 | C  | 1 | -3.142 | -0.500 | -1.486 | 0.00 | 0.00 | C  |
| HETATM  | 21 | C  | 1 | 0.366  | 2.776  | 0.173  | 0.00 | 0.00 | C  |
| HETATM  | 22 | C  | 1 | 0.150  | -2.235 | -4.538 | 0.00 | 0.00 | C  |
| HETATM  | 23 | C  | 1 | -2.233 | 3.013  | -2.579 | 0.00 | 0.00 | C  |
| HETATM  | 24 | O  | 1 | 1.277  | 0.733  | -2.746 | 0.00 | 0.00 | O  |
| HETATM  | 25 | Br | 1 | -0.410 | -4.936 | -3.821 | 0.00 | 0.00 | Br |
| HETATM  | 26 | H  | 1 | 2.438  | 0.069  | 4.251  | 0.00 | 0.00 | H  |
| HETATM  | 27 | H  | 1 | 3.852  | -1.203 | 2.545  | 0.00 | 0.00 | H  |
| HETATM  | 28 | H  | 1 | -1.675 | -0.458 | 0.508  | 0.00 | 0.00 | H  |
| HETATM  | 29 | H  | 1 | 0.387  | -3.445 | -1.403 | 0.00 | 0.00 | H  |
| HETATM  | 30 | H  | 1 | 0.594  | -0.227 | -5.100 | 0.00 | 0.00 | H  |
| HETATM  | 31 | H  | 1 | 0.931  | 1.342  | -3.383 | 0.00 | 0.00 | H  |
| HETATM  | 32 | H  | 1 | -0.713 | 4.274  | -1.773 | 0.00 | 0.00 | H  |
| HETATM  | 33 | H  | 1 | -3.679 | 1.550  | -3.140 | 0.00 | 0.00 | H  |
| HETATM  | 34 | H  | 1 | -2.443 | -1.325 | -1.581 | 0.00 | 0.00 | H  |
| HETATM  | 35 | H  | 1 | -3.868 | -0.591 | -2.285 | 0.00 | 0.00 | H  |
| HETATM  | 36 | H  | 1 | -3.681 | -0.629 | -0.550 | 0.00 | 0.00 | H  |
| HETATM  | 37 | H  | 1 | 0.518  | 3.849  | 0.163  | 0.00 | 0.00 | H  |
| HETATM  | 38 | H  | 1 | 0.142  | 2.472  | 1.189  | 0.00 | 0.00 | H  |
| HETATM  | 39 | H  | 1 | 1.298  | 2.303  | -0.116 | 0.00 | 0.00 | H  |
| HETATM  | 40 | H  | 1 | -0.101 | -2.545 | -5.534 | 0.00 | 0.00 | H  |
| HETATM  | 41 | H  | 1 | -2.564 | 3.737  | -3.302 | 0.00 | 0.00 | H  |
| CONNECT | 1  | 2  |   |        |        |        |      |      |    |
| CONNECT | 1  | 2  |   |        |        |        |      |      |    |
| CONNECT | 1  | 2  |   |        |        |        |      |      |    |
| CONNECT | 1  | 2  |   |        |        |        |      |      |    |
| CONNECT | 1  | 6  |   |        |        |        |      |      |    |
| CONNECT | 1  | 6  |   |        |        |        |      |      |    |
| CONNECT | 1  | 6  |   |        |        |        |      |      |    |
| CONNECT | 1  | 6  |   |        |        |        |      |      |    |
| CONNECT | 2  | 1  |   |        |        |        |      |      |    |
| CONNECT | 2  | 1  |   |        |        |        |      |      |    |
| CONNECT | 2  | 1  |   |        |        |        |      |      |    |
| CONNECT | 2  | 7  |   |        |        |        |      |      |    |
| CONNECT | 2  | 7  |   |        |        |        |      |      |    |
| CONNECT | 2  | 7  |   |        |        |        |      |      |    |
| CONNECT | 2  | 7  |   |        |        |        |      |      |    |
| CONNECT | 2  | 8  |   |        |        |        |      |      |    |
| CONNECT | 2  | 8  |   |        |        |        |      |      |    |
| CONNECT | 2  | 8  |   |        |        |        |      |      |    |
| CONNECT | 2  | 8  |   |        |        |        |      |      |    |
| CONNECT | 3  | 6  |   |        |        |        |      |      |    |
| CONNECT | 3  | 6  |   |        |        |        |      |      |    |
| CONNECT | 3  | 6  |   |        |        |        |      |      |    |
| CONNECT | 3  | 6  |   |        |        |        |      |      |    |
| CONNECT | 3  | 7  |   |        |        |        |      |      |    |
| CONNECT | 3  | 7  |   |        |        |        |      |      |    |
| CONNECT | 3  | 7  |   |        |        |        |      |      |    |
| CONNECT | 3  | 7  |   |        |        |        |      |      |    |
| CONNECT | 3  | 27 |   |        |        |        |      |      |    |

|        |    |    |    |    |
|--------|----|----|----|----|
| CONECT | 4  | 7  |    |    |
| CONECT | 4  | 7  |    |    |
| CONECT | 4  | 7  |    |    |
| CONECT | 4  | 7  |    |    |
| CONECT | 4  | 9  |    |    |
| CONECT | 4  | 9  |    |    |
| CONECT | 4  | 9  |    |    |
| CONECT | 4  | 9  |    |    |
| CONECT | 5  | 8  | 11 | 28 |
| CONECT | 6  | 1  |    |    |
| CONECT | 6  | 1  |    |    |
| CONECT | 6  | 1  |    |    |
| CONECT | 6  | 1  |    |    |
| CONECT | 6  | 3  |    |    |
| CONECT | 6  | 3  |    |    |
| CONECT | 6  | 3  |    |    |
| CONECT | 6  | 3  |    |    |
| CONECT | 6  | 26 |    |    |
| CONECT | 7  | 2  |    |    |
| CONECT | 7  | 2  |    |    |
| CONECT | 7  | 2  |    |    |
| CONECT | 7  | 2  |    |    |
| CONECT | 7  | 3  |    |    |
| CONECT | 7  | 3  |    |    |
| CONECT | 7  | 3  |    |    |
| CONECT | 7  | 3  |    |    |
| CONECT | 7  | 4  |    |    |
| CONECT | 7  | 4  |    |    |
| CONECT | 7  | 4  |    |    |
| CONECT | 7  | 4  |    |    |
| CONECT | 8  | 2  |    |    |
| CONECT | 8  | 2  |    |    |
| CONECT | 8  | 2  |    |    |
| CONECT | 8  | 2  |    |    |
| CONECT | 8  | 5  |    |    |
| CONECT | 8  | 9  |    |    |
| CONECT | 8  | 9  |    |    |
| CONECT | 8  | 9  |    |    |
| CONECT | 8  | 9  |    |    |
| CONECT | 9  | 4  |    |    |
| CONECT | 9  | 4  |    |    |
| CONECT | 9  | 4  |    |    |
| CONECT | 9  | 4  |    |    |
| CONECT | 9  | 8  |    |    |
| CONECT | 9  | 8  |    |    |
| CONECT | 9  | 8  |    |    |
| CONECT | 9  | 8  |    |    |
| CONECT | 9  | 10 |    |    |
| CONECT | 10 | 9  |    |    |
| CONECT | 10 | 12 |    |    |
| CONECT | 10 | 12 |    |    |
| CONECT | 10 | 12 |    |    |
| CONECT | 10 | 12 |    |    |
| CONECT | 10 | 13 |    |    |
| CONECT | 10 | 13 |    |    |



|         |    |    |
|---------|----|----|
| CONNECT | 10 | 13 |
| CONNECT | 10 | 13 |
| CONNECT | 11 | 5  |
| CONNECT | 11 | 14 |
| CONNECT | 11 | 14 |
| CONNECT | 11 | 14 |
| CONNECT | 11 | 14 |
| CONNECT | 11 | 15 |
| CONNECT | 11 | 15 |
| CONNECT | 11 | 15 |
| CONNECT | 11 | 15 |
| CONNECT | 12 | 10 |
| CONNECT | 12 | 10 |
| CONNECT | 12 | 10 |
| CONNECT | 12 | 10 |
| CONNECT | 12 | 16 |
| CONNECT | 12 | 16 |
| CONNECT | 12 | 16 |
| CONNECT | 12 | 16 |
| CONNECT | 12 | 29 |
| CONNECT | 13 | 10 |
| CONNECT | 13 | 10 |
| CONNECT | 13 | 10 |
| CONNECT | 13 | 10 |
| CONNECT | 13 | 17 |
| CONNECT | 13 | 17 |
| CONNECT | 13 | 17 |
| CONNECT | 13 | 17 |
| CONNECT | 13 | 24 |
| CONNECT | 14 | 11 |
| CONNECT | 14 | 11 |
| CONNECT | 14 | 11 |
| CONNECT | 14 | 11 |
| CONNECT | 14 | 18 |
| CONNECT | 14 | 18 |
| CONNECT | 14 | 18 |
| CONNECT | 14 | 18 |
| CONNECT | 14 | 21 |
| CONNECT | 15 | 11 |
| CONNECT | 15 | 11 |
| CONNECT | 15 | 11 |
| CONNECT | 15 | 11 |
| CONNECT | 15 | 19 |
| CONNECT | 15 | 19 |
| CONNECT | 15 | 19 |
| CONNECT | 15 | 19 |
| CONNECT | 15 | 20 |
| CONNECT | 16 | 12 |
| CONNECT | 16 | 12 |
| CONNECT | 16 | 12 |
| CONNECT | 16 | 12 |
| CONNECT | 16 | 22 |
| CONNECT | 16 | 22 |
| CONNECT | 16 | 22 |
| CONNECT | 16 | 22 |

|        |    |    |    |    |    |
|--------|----|----|----|----|----|
| CONECT | 16 | 25 |    |    |    |
| CONECT | 17 | 13 |    |    |    |
| CONECT | 17 | 13 |    |    |    |
| CONECT | 17 | 13 |    |    |    |
| CONECT | 17 | 13 |    |    |    |
| CONECT | 17 | 22 |    |    |    |
| CONECT | 17 | 22 |    |    |    |
| CONECT | 17 | 22 |    |    |    |
| CONECT | 17 | 22 |    |    |    |
| CONECT | 17 | 30 |    |    |    |
| CONECT | 18 | 14 |    |    |    |
| CONECT | 18 | 14 |    |    |    |
| CONECT | 18 | 14 |    |    |    |
| CONECT | 18 | 14 |    |    |    |
| CONECT | 18 | 23 |    |    |    |
| CONECT | 18 | 23 |    |    |    |
| CONECT | 18 | 23 |    |    |    |
| CONECT | 18 | 23 |    |    |    |
| CONECT | 18 | 32 |    |    |    |
| CONECT | 19 | 15 |    |    |    |
| CONECT | 19 | 15 |    |    |    |
| CONECT | 19 | 15 |    |    |    |
| CONECT | 19 | 15 |    |    |    |
| CONECT | 19 | 23 |    |    |    |
| CONECT | 19 | 23 |    |    |    |
| CONECT | 19 | 23 |    |    |    |
| CONECT | 19 | 23 |    |    |    |
| CONECT | 19 | 33 |    |    |    |
| CONECT | 20 | 15 | 34 | 35 | 36 |
| CONECT | 21 | 14 | 37 | 38 | 39 |
| CONECT | 22 | 16 |    |    |    |
| CONECT | 22 | 16 |    |    |    |
| CONECT | 22 | 16 |    |    |    |
| CONECT | 22 | 16 |    |    |    |
| CONECT | 22 | 17 |    |    |    |
| CONECT | 22 | 17 |    |    |    |
| CONECT | 22 | 17 |    |    |    |
| CONECT | 22 | 17 |    |    |    |
| CONECT | 22 | 40 |    |    |    |
| CONECT | 23 | 18 |    |    |    |
| CONECT | 23 | 18 |    |    |    |
| CONECT | 23 | 18 |    |    |    |
| CONECT | 23 | 18 |    |    |    |
| CONECT | 23 | 19 |    |    |    |
| CONECT | 23 | 19 |    |    |    |
| CONECT | 23 | 19 |    |    |    |
| CONECT | 23 | 19 |    |    |    |
| CONECT | 23 | 41 |    |    |    |
| CONECT | 24 | 13 | 31 |    |    |
| CONECT | 25 | 16 |    |    |    |
| CONECT | 26 | 6  |    |    |    |
| CONECT | 27 | 3  |    |    |    |
| CONECT | 28 | 5  |    |    |    |
| CONECT | 29 | 12 |    |    |    |
| CONECT | 30 | 17 |    |    |    |

```

CONNECT 31 24
CONNECT 32 18
CONNECT 33 19
CONNECT 34 20
CONNECT 35 20
CONNECT 36 20
CONNECT 37 21
CONNECT 38 21
CONNECT 39 21
CONNECT 40 22
CONNECT 41 23
END

```

Dataset S5. Cartesian coordinates of **(S)-Retro-1** that is energy minimized at the HF/6-31G(d) level and superimposed over **(S)-Retro-2<sup>cycl</sup>**.

|        |    |    |   |        |        |        |      |      |    |
|--------|----|----|---|--------|--------|--------|------|------|----|
| HETATM | 1  | N  | 1 | -2.734 | -1.342 | -1.020 | 0.00 | 0.00 | N  |
| HETATM | 2  | N  | 1 | 0.159  | -1.747 | -1.121 | 0.00 | 0.00 | N  |
| HETATM | 3  | C  | 1 | -2.216 | -0.058 | -0.728 | 0.00 | 0.00 | C  |
| HETATM | 4  | C  | 1 | -2.220 | -2.565 | -1.359 | 0.00 | 0.00 | C  |
| HETATM | 5  | C  | 1 | -3.048 | 1.020  | -1.009 | 0.00 | 0.00 | C  |
| HETATM | 6  | C  | 1 | -0.971 | 0.166  | -0.141 | 0.00 | 0.00 | C  |
| HETATM | 7  | C  | 1 | -0.725 | -2.863 | -1.342 | 0.00 | 0.00 | C  |
| HETATM | 8  | C  | 1 | -2.655 | 2.312  | -0.724 | 0.00 | 0.00 | C  |
| HETATM | 9  | C  | 1 | -0.572 | 1.468  | 0.112  | 0.00 | 0.00 | C  |
| HETATM | 10 | C  | 1 | -0.104 | -1.051 | 0.145  | 0.00 | 0.00 | C  |
| HETATM | 11 | C  | 1 | -1.411 | 2.528  | -0.168 | 0.00 | 0.00 | C  |
| HETATM | 12 | C  | 1 | 0.805  | -1.083 | -2.137 | 0.00 | 0.00 | C  |
| HETATM | 13 | C  | 1 | 1.090  | -0.854 | 1.074  | 0.00 | 0.00 | C  |
| HETATM | 14 | C  | 1 | 0.843  | -1.734 | -3.513 | 0.00 | 0.00 | C  |
| HETATM | 15 | C  | 1 | 2.400  | -1.141 | 0.723  | 0.00 | 0.00 | C  |
| HETATM | 16 | C  | 1 | 0.826  | -0.450 | 2.381  | 0.00 | 0.00 | C  |
| HETATM | 17 | C  | 1 | 1.688  | -0.936 | -4.500 | 0.00 | 0.00 | C  |
| HETATM | 18 | C  | 1 | 3.423  | -1.011 | 1.652  | 0.00 | 0.00 | C  |
| HETATM | 19 | C  | 1 | 1.844  | -0.314 | 3.306  | 0.00 | 0.00 | C  |
| HETATM | 20 | C  | 1 | 3.153  | -0.594 | 2.943  | 0.00 | 0.00 | C  |
| HETATM | 21 | O  | 1 | -2.966 | -3.455 | -1.654 | 0.00 | 0.00 | O  |
| HETATM | 22 | O  | 1 | 1.349  | -0.034 | -1.934 | 0.00 | 0.00 | O  |
| HETATM | 23 | Br | 1 | -0.844 | 4.299  | 0.207  | 0.00 | 0.00 | Br |
| HETATM | 24 | H  | 1 | -3.727 | -1.368 | -1.115 | 0.00 | 0.00 | H  |
| HETATM | 25 | H  | 1 | -4.009 | 0.847  | -1.459 | 0.00 | 0.00 | H  |
| HETATM | 26 | H  | 1 | -0.514 | -3.364 | -2.270 | 0.00 | 0.00 | H  |
| HETATM | 27 | H  | 1 | -0.582 | -3.603 | -0.562 | 0.00 | 0.00 | H  |
| HETATM | 28 | H  | 1 | -3.307 | 3.136  | -0.943 | 0.00 | 0.00 | H  |
| HETATM | 29 | H  | 1 | 0.399  | 1.650  | 0.527  | 0.00 | 0.00 | H  |
| HETATM | 30 | H  | 1 | -0.747 | -1.735 | 0.688  | 0.00 | 0.00 | H  |
| HETATM | 31 | H  | 1 | -0.173 | -1.830 | -3.886 | 0.00 | 0.00 | H  |
| HETATM | 32 | H  | 1 | 1.231  | -2.744 | -3.419 | 0.00 | 0.00 | H  |
| HETATM | 33 | H  | 1 | 2.637  | -1.457 | -0.271 | 0.00 | 0.00 | H  |
| HETATM | 34 | H  | 1 | -0.187 | -0.238 | 2.680  | 0.00 | 0.00 | H  |
| HETATM | 35 | H  | 1 | 1.299  | 0.067  | -4.622 | 0.00 | 0.00 | H  |
| HETATM | 36 | H  | 1 | 1.686  | -1.428 | -5.466 | 0.00 | 0.00 | H  |
| HETATM | 37 | H  | 1 | 2.711  | -0.851 | -4.159 | 0.00 | 0.00 | H  |
| HETATM | 38 | H  | 1 | 4.432  | -1.233 | 1.359  | 0.00 | 0.00 | H  |

|         |    |    |    |    |       |        |       |      |      |  |   |
|---------|----|----|----|----|-------|--------|-------|------|------|--|---|
| HETATM  | 39 | H  |    | 1  | 1.616 | 0.003  | 4.308 | 0.00 | 0.00 |  | H |
| HETATM  | 40 | H  |    | 1  | 3.948 | -0.493 | 3.659 | 0.00 | 0.00 |  | H |
| CONNECT | 1  | 3  | 4  | 24 |       |        |       |      |      |  |   |
| CONNECT | 2  | 7  | 10 | 12 |       |        |       |      |      |  |   |
| CONNECT | 3  | 1  |    |    |       |        |       |      |      |  |   |
| CONNECT | 3  | 5  |    |    |       |        |       |      |      |  |   |
| CONNECT | 3  | 5  |    |    |       |        |       |      |      |  |   |
| CONNECT | 3  | 5  |    |    |       |        |       |      |      |  |   |
| CONNECT | 3  | 5  |    |    |       |        |       |      |      |  |   |
| CONNECT | 3  | 6  |    |    |       |        |       |      |      |  |   |
| CONNECT | 3  | 6  |    |    |       |        |       |      |      |  |   |
| CONNECT | 3  | 6  |    |    |       |        |       |      |      |  |   |
| CONNECT | 3  | 6  |    |    |       |        |       |      |      |  |   |
| CONNECT | 4  | 1  | 7  |    |       |        |       |      |      |  |   |
| CONNECT | 4  | 21 |    |    |       |        |       |      |      |  |   |
| CONNECT | 4  | 21 |    |    |       |        |       |      |      |  |   |
| CONNECT | 5  | 3  |    |    |       |        |       |      |      |  |   |
| CONNECT | 5  | 3  |    |    |       |        |       |      |      |  |   |
| CONNECT | 5  | 3  |    |    |       |        |       |      |      |  |   |
| CONNECT | 5  | 3  |    |    |       |        |       |      |      |  |   |
| CONNECT | 5  | 8  |    |    |       |        |       |      |      |  |   |
| CONNECT | 5  | 8  |    |    |       |        |       |      |      |  |   |
| CONNECT | 5  | 8  |    |    |       |        |       |      |      |  |   |
| CONNECT | 5  | 8  |    |    |       |        |       |      |      |  |   |
| CONNECT | 5  | 25 |    |    |       |        |       |      |      |  |   |
| CONNECT | 6  | 3  |    |    |       |        |       |      |      |  |   |
| CONNECT | 6  | 3  |    |    |       |        |       |      |      |  |   |
| CONNECT | 6  | 3  |    |    |       |        |       |      |      |  |   |
| CONNECT | 6  | 3  |    |    |       |        |       |      |      |  |   |
| CONNECT | 6  | 9  |    |    |       |        |       |      |      |  |   |
| CONNECT | 6  | 9  |    |    |       |        |       |      |      |  |   |
| CONNECT | 6  | 9  |    |    |       |        |       |      |      |  |   |
| CONNECT | 6  | 9  |    |    |       |        |       |      |      |  |   |
| CONNECT | 6  | 10 |    |    |       |        |       |      |      |  |   |
| CONNECT | 7  | 2  | 4  | 26 | 27    |        |       |      |      |  |   |
| CONNECT | 8  | 5  |    |    |       |        |       |      |      |  |   |
| CONNECT | 8  | 5  |    |    |       |        |       |      |      |  |   |
| CONNECT | 8  | 5  |    |    |       |        |       |      |      |  |   |
| CONNECT | 8  | 5  |    |    |       |        |       |      |      |  |   |
| CONNECT | 8  | 11 |    |    |       |        |       |      |      |  |   |
| CONNECT | 8  | 11 |    |    |       |        |       |      |      |  |   |
| CONNECT | 8  | 11 |    |    |       |        |       |      |      |  |   |
| CONNECT | 8  | 11 |    |    |       |        |       |      |      |  |   |
| CONNECT | 8  | 28 |    |    |       |        |       |      |      |  |   |
| CONNECT | 9  | 6  |    |    |       |        |       |      |      |  |   |
| CONNECT | 9  | 6  |    |    |       |        |       |      |      |  |   |
| CONNECT | 9  | 6  |    |    |       |        |       |      |      |  |   |
| CONNECT | 9  | 6  |    |    |       |        |       |      |      |  |   |
| CONNECT | 9  | 11 |    |    |       |        |       |      |      |  |   |
| CONNECT | 9  | 11 |    |    |       |        |       |      |      |  |   |
| CONNECT | 9  | 11 |    |    |       |        |       |      |      |  |   |
| CONNECT | 9  | 11 |    |    |       |        |       |      |      |  |   |
| CONNECT | 9  | 11 |    |    |       |        |       |      |      |  |   |
| CONNECT | 9  | 29 |    |    |       |        |       |      |      |  |   |
| CONNECT | 10 | 2  | 6  | 13 | 30    |        |       |      |      |  |   |
| CONNECT | 11 | 8  |    |    |       |        |       |      |      |  |   |

|        |    |    |    |    |    |
|--------|----|----|----|----|----|
| CONECT | 11 | 8  |    |    |    |
| CONECT | 11 | 8  |    |    |    |
| CONECT | 11 | 8  |    |    |    |
| CONECT | 11 | 9  |    |    |    |
| CONECT | 11 | 9  |    |    |    |
| CONECT | 11 | 9  |    |    |    |
| CONECT | 11 | 9  |    |    |    |
| CONECT | 11 | 23 |    |    |    |
| CONECT | 12 | 2  | 14 |    |    |
| CONECT | 12 | 22 |    |    |    |
| CONECT | 12 | 22 |    |    |    |
| CONECT | 13 | 10 |    |    |    |
| CONECT | 13 | 15 |    |    |    |
| CONECT | 13 | 15 |    |    |    |
| CONECT | 13 | 15 |    |    |    |
| CONECT | 13 | 15 |    |    |    |
| CONECT | 13 | 16 |    |    |    |
| CONECT | 13 | 16 |    |    |    |
| CONECT | 13 | 16 |    |    |    |
| CONECT | 13 | 16 |    |    |    |
| CONECT | 14 | 12 | 17 | 31 | 32 |
| CONECT | 15 | 13 |    |    |    |
| CONECT | 15 | 13 |    |    |    |
| CONECT | 15 | 13 |    |    |    |
| CONECT | 15 | 13 |    |    |    |
| CONECT | 15 | 18 |    |    |    |
| CONECT | 15 | 18 |    |    |    |
| CONECT | 15 | 18 |    |    |    |
| CONECT | 15 | 18 |    |    |    |
| CONECT | 15 | 33 |    |    |    |
| CONECT | 16 | 13 |    |    |    |
| CONECT | 16 | 13 |    |    |    |
| CONECT | 16 | 13 |    |    |    |
| CONECT | 16 | 13 |    |    |    |
| CONECT | 16 | 19 |    |    |    |
| CONECT | 16 | 19 |    |    |    |
| CONECT | 16 | 19 |    |    |    |
| CONECT | 16 | 19 |    |    |    |
| CONECT | 16 | 34 |    |    |    |
| CONECT | 17 | 14 | 35 | 36 | 37 |
| CONECT | 18 | 15 |    |    |    |
| CONECT | 18 | 15 |    |    |    |
| CONECT | 18 | 15 |    |    |    |
| CONECT | 18 | 15 |    |    |    |
| CONECT | 18 | 20 |    |    |    |
| CONECT | 18 | 20 |    |    |    |
| CONECT | 18 | 20 |    |    |    |
| CONECT | 18 | 20 |    |    |    |
| CONECT | 18 | 38 |    |    |    |
| CONECT | 19 | 16 |    |    |    |
| CONECT | 19 | 16 |    |    |    |
| CONECT | 19 | 16 |    |    |    |
| CONECT | 19 | 16 |    |    |    |
| CONECT | 19 | 20 |    |    |    |
| CONECT | 19 | 20 |    |    |    |

|         |    |    |
|---------|----|----|
| CONNECT | 19 | 20 |
| CONNECT | 19 | 20 |
| CONNECT | 19 | 39 |
| CONNECT | 20 | 18 |
| CONNECT | 20 | 18 |
| CONNECT | 20 | 18 |
| CONNECT | 20 | 18 |
| CONNECT | 20 | 19 |
| CONNECT | 20 | 19 |
| CONNECT | 20 | 19 |
| CONNECT | 20 | 19 |
| CONNECT | 20 | 40 |
| CONNECT | 21 | 4  |
| CONNECT | 21 | 4  |
| CONNECT | 22 | 12 |
| CONNECT | 22 | 12 |
| CONNECT | 23 | 11 |
| CONNECT | 24 | 1  |
| CONNECT | 25 | 5  |
| CONNECT | 26 | 7  |
| CONNECT | 27 | 7  |
| CONNECT | 28 | 8  |
| CONNECT | 29 | 9  |
| CONNECT | 30 | 10 |
| CONNECT | 31 | 14 |
| CONNECT | 32 | 14 |
| CONNECT | 33 | 15 |
| CONNECT | 34 | 16 |
| CONNECT | 35 | 17 |
| CONNECT | 36 | 17 |
| CONNECT | 37 | 17 |
| CONNECT | 38 | 18 |
| CONNECT | 39 | 19 |
| CONNECT | 40 | 20 |

END
